# Supplementary material for: Functional Metagenomics Characterization of an Anaerobic Saltwater Bioreactor
Source: Hindawi journal article supplement (doi:10.1155/2019/4527628), 2019-05-02
Supplement: f1 [file 4527628.f1.pdf]

## Supplementary Material (two figures and six tables)

### Supplementary Figure 1 Rarefaction curves of community profile metagenomic datasets generated in this study

Sequencing details for each sample are listed in Supplementary Table 3.

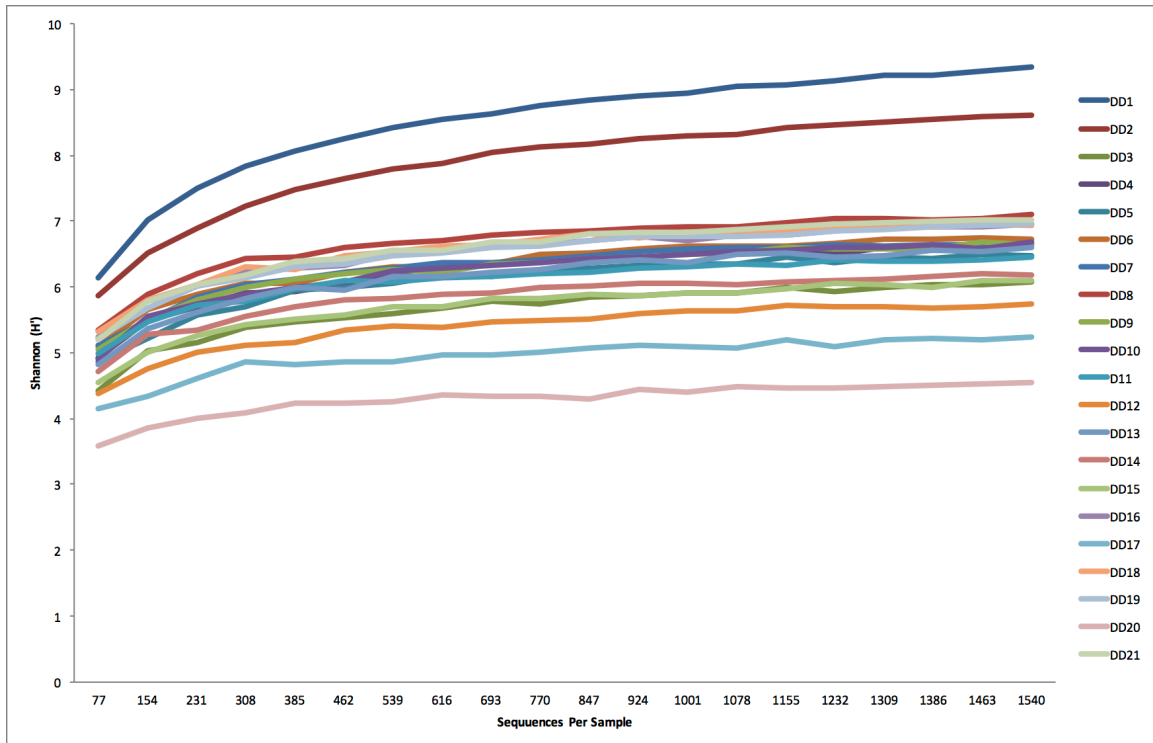

## Supplementary Figure 2 Change in $\alpha$ diversity of the bioreactors over time

$\alpha$  diversity was measured using the unweighted unifrac measure, as described in Methods.

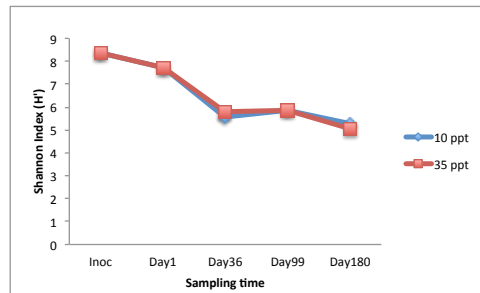

Change in alpha diversity over time

**Supplementary Table 1** Loading regime for 2L bioreactors

| True OLR<br>(g VS*L <sup>-1</sup> *d <sup>-1</sup> ) | Specific volume of<br>biogas produced<br>(ml/g VS*d <sup>-1</sup> )<br><br>(1.0% salinity) | Specific volume of<br>biogas produced<br>(ml/g VS*d <sup>-1</sup> )<br><br>(3.5% salinity) | Ratio<br><br>(spec. biogas yield<br>35ppt/10 ppt) |
|------------------------------------------------------|--------------------------------------------------------------------------------------------|--------------------------------------------------------------------------------------------|---------------------------------------------------|
| 1.4                                                  | 98                                                                                         | 55                                                                                         | 0.56                                              |
| 1.7                                                  | 132                                                                                        | 79                                                                                         | 0.60                                              |
| 3.5                                                  | 112                                                                                        | 49                                                                                         | 0.44                                              |
| 4.6                                                  | 75                                                                                         | 25                                                                                         | 0.33                                              |
| 5.7                                                  | 45                                                                                         | 45                                                                                         | 1.00                                              |

**Supplementary Table 2** Peak specific yield and composition of biogas

| Parameter                                                      | Value<br><br>1 % salinity | Value<br><br>3.5% salinity | Units                                                                                                                                |
|----------------------------------------------------------------|---------------------------|----------------------------|--------------------------------------------------------------------------------------------------------------------------------------|
| Peak specific yield of biogas                                  | 144                       | 100                        | ml biogas per g VS*L <sup>-1</sup> *d <sup>-1</sup>                                                                                  |
| CH <sub>4</sub> / CO <sub>2</sub> ratio                        | 1.17                      | 1.07                       | dimensionless                                                                                                                        |
| Average % CH <sub>4</sub>                                      | 50.2%*<br>(N=6;SE=2.1)    | 47.3%<br>(N=6; SE=2.7)     | vol. percent in biogas                                                                                                               |
| Average % CO <sub>2</sub>                                      | 43.1%*<br>(N=4;SE=4.9)    | 44.3%<br>(N=5; SE=5.4)     | vol. percent in biogas                                                                                                               |
| Estimated % of total CO <sub>2</sub> in<br>gas phase           | 86%                       | 94%                        | assuming 1:1 stoichiometry of CO <sub>2</sub> :CH <sub>4</sub><br>production                                                         |
| Estimated % of total CO <sub>2</sub> in<br>gas phase           | 56%                       | 58%                        | Based on saturation solubility of CO <sub>2</sub> in<br>seawater at 25°C and 1% or 3% salinity and<br>no precipitation of carbonates |
| Estimated stoichiometry of<br>CO <sub>2</sub> /CH <sub>4</sub> | 1.5:1.0                   | 1.6:1.0                    | Based on saturation solubility of CO <sub>2</sub> in<br>seawater at 25°C and 1% or 3% salinity and<br>no precipitation of carbonates |

\* The sum of CH<sub>4</sub>+CO<sub>2</sub>+H<sub>2</sub>O was normalized to 95 % of the biogas in the 1.0 % salinity reactor (correction factor =0.83). No normalization was necessary for the 3.5 % salinity reactor

**Supplementary Table 3** Summary of information about each sample used in the  
16S rRNA community profile meta-analysis

| Sample number | Sample ID | Substrate         | True Name     | Salinity     | 16S region | Description     | References            |
|---------------|-----------|-------------------|---------------|--------------|------------|-----------------|-----------------------|
| 1             | H1        | Sorghum           | Sea sediment  | High         | V1-V3      | Marine Sediment | Hollister et al. 2010 |
| 2             | H2        | Sorghum           | Day 78        | Low          | V1-V3      | Bioreactor      | Hollister et al. 2010 |
| 3             | H3        | Sorghum           | Day 30        | Low          | V1-V3      | Bioreactor      | Hollister et al. 2010 |
| 4             | H4        | Sorghum           | Day 48        | Low          | V1-V3      | Bioreactor      | Hollister et al. 2010 |
| 5             | H5        | Sorghum           | Day 62        | Low          | V1-V3      | Bioreactor      | Hollister et al. 2010 |
| 6             | H6        | Sorghum           | Day 78        | Low          | V1-V3      | Bioreactor      | Hollister et al. 2010 |
| 7             | DD1       | Lagoon Sediment   | To.Mar.13     | Intermediate | V4         | Lagoon Sediment | This work             |
| 8             | DD2       | Lagoon Sediment   | T1.Apr.13     | Intermediate | V4         | Lagoon Sediment | This work             |
| 9             | DD3       | Sargassum         | PD10.Jun.13   | Low          | V4         | Bioreactor      | This work             |
| 10            | DD4       | Sargassum         | DG10.Jun.13   | Low          | V4         | Bioreactor      | This work             |
| 11            | DD5       | Sargassum         | DG30.Jun.13   | High         | V4         | Bioreactor      | This work             |
| 12            | DD6       | Sargassum         | PD30.Jun.13   | High         | V4         | Bioreactor      | This work             |
| 13            | DD7       | Sargassum         | DG10.Aug.13   | Low          | V4         | Bioreactor      | This work             |
| 14            | DD8       | Sargassum         | PD.30..Aug.13 | High         | V4         | Bioreactor      | This work             |
| 15            | DD9       | Sargassum         | PD10.Aug.13   | Low          | V4         | Bioreactor      | This work             |
| 16            | DD10      | Sargassum         | DG30.Aug.13   | High         | V4         | Bioreactor      | This work             |
| 17            | DD11      | Sargassum         | PD30.Oct.13   | High         | V4         | Bioreactor      | This work             |
| 18            | DD12      | Sargassum         | PD10.Oct.13   | Low          | V4         | Bioreactor      | This work             |
| 19            | DD13      | Sargassum         | DG30.Oct.13   | High         | V4         | Bioreactor      | This work             |
| 20            | DD14      | Sargassum         | DG10.Oct.13   | Low          | V4         | Bioreactor      | This work             |
| 21            | DD15      | Sargassum         | S310.OCT.13   | Low          | V4         | Bioreactor      | This work             |
| 22            | DD16      | Sargassum         | S3.35.OCT.13  | High         | V4         | Bioreactor      | This work             |
| 23            | DD17      | Sargassum         | S1.10.OCT.13  | Low          | V4         | Bioreactor      | This work             |
| 24            | DD18      | Sargassum         | S1.35.OCT.13  | High         | V4         | Bioreactor      | This work             |
| 25            | DD19      | Sargassum         | PD.10ppt.M    | Low          | V4         | Bioreactor      | This work             |
| 26            | DD20      | Sargassum         | DG.10ppt.M    | Low          | V4         | Bioreactor      | This work             |
| 27            | DD21      | Sargassum         | PD.35ppt.M    | High         | V4         | Bioreactor      | This work             |
| 28            | C1        | Sewage Sludge     | SS1as         | Low          | V3-V4      | Bioreactor      | Sundberg et al. 2013  |
| 29            | C2        | Sewage Sludge     | SS1bs         | Low          | V3-V4      | Bioreactor      | Sundberg et al. 2013  |
| 30            | C3        | Sewage Sludge     | SS3a          | Low          | V3-V4      | Bioreactor      | Sundberg et al. 2013  |
| 31            | C4        | Sewage Sludge     | SS3b          | Low          | V3-V4      | Bioreactor      | Sundberg et al. 2013  |
| 32            | C5        | Sewage Sludge     | SS4p          | Low          | V3-V4      | Bioreactor      | Sundberg et al. 2013  |
| 33            | C6        | Sewage Sludge     | SS5           | Low          | V3-V4      | Bioreactor      | Sundberg et al. 2013  |
| 34            | C7        | Codigested Sludge | CD1           | Low          | V3-V4      | Bioreactor      | Sundberg et al. 2013  |

|    |      |                   |       |     |       |            |                      |
|----|------|-------------------|-------|-----|-------|------------|----------------------|
| 35 | C8   | Codigested Sludge | CD4ap | Low | V3-V4 | Bioreactor | Sundberg et al. 2013 |
| 36 | C9   | Codigested Sludge | CD4bp | Low | V3-V4 | Bioreactor | Sundberg et al. 2013 |
| 37 | C10  | Codigested Sludge | CD5ap | Low | V3-V4 | Bioreactor | Sundberg et al. 2013 |
| 38 | C11  | Codigested Sludge | CD7a  | Low | V3-V4 | Bioreactor | Sundberg et al. 2013 |
| 39 | BR.1 | Sewage Sludge     | NA    | Low | V3-V5 | Bioreactor | Shu et al. 2015      |
| 40 | BR.2 | Sewage Sludge     | NA    | Low | V3-V5 | Bioreactor | Shu et al., 2015     |
| 41 | BR.3 | Sewage Sludge     | NA    | Low | V3-V5 | Bioreactor | Shu et al., 2015     |
| 42 | BR.4 | Sewage Sludge     | NA    | Low | V3-V5 | Bioreactor | Shu et al., 2015     |
| 43 | BR.5 | Sewage Sludge     | NA    | Low | V3-V5 | Bioreactor | Shu et al., 2015     |
| 44 | BR.6 | Sewage Sludge     | NA    | Low | V3-V5 | Bioreactor | Shu et al., 2015     |

Additional references:

Hollister et al. (2010) Microbial community composition and dynamics in a semi-industrial-scale facility operating under the MixAlco bioconversion platform. *Journal of Applied Microbiology* **110**, 587-596

Shu et al. (2015) Microbial structures and community functions of anaerobic sludge in six full-scale wastewater treatment plants as revealed by 454 high-throughput pyrosequencing. *Bioresource Technology* **186**, 163-172.

#### Supplementary Table 4 16S rRNA community profile datasets

In the table each sample is linked to its biomass feedstock, the number of sequences before and after filtering and the number of Operational Taxonomic Units (OTUs). A total of 324797 raw reads (sequence lengths (mean  $\pm$  std): 311.4244  $\pm$  169.7861) were used for the analysis. After filtering, a total 260877 sequences were used for the downstream analysis (sequence lengths (mean  $\pm$  std): 376.0740  $\pm$  144.5148)

| Sample number | Sample ID | Substrate         | Number of raw reads | Number of filtered reads | Number of OTUs | Proportion of archaea (%) |
|---------------|-----------|-------------------|---------------------|--------------------------|----------------|---------------------------|
| 1             | H1        | Deep Sea sediment | 7920                | 6958                     | 3923           | 0                         |
| 2             | H2        | Sorghum           | 4396                | 3940                     | 1759           | 0                         |
| 3             | H3        | Sorghum           | 10344               | 9736                     | 3923           | 0                         |
| 4             | H4        | Sorghum           | 4729                | 4402                     | 1946           | 0                         |
| 5             | H5        | Sorghum           | 4696                | 4386                     | 2389           | 0                         |
| 6             | H6        | Sorghum           | 4142                | 4076                     | 2469           | 0                         |
| 7             | DD1       | Lagoon Sediment   | 6092                | 4523                     | 700            | 32.5                      |
| 8             | DD2       | Lagoon Sediment   | 7821                | 5668                     | 889            | 8.70                      |
| 9             | DD3       | Sargassum         | 13359               | 10468                    | 1566           | 0.83                      |
| 10            | DD4       | Sargassum         | 11573               | 9597                     | 1688           | 0.90                      |
| 11            | DD5       | Sargassum         | 6458                | 5344                     | 1044           | 0.72                      |
| 12            | DD6       | Sargassum         | 9143                | 7044                     | 1238           | 0.20                      |
| 13            | DD7       | Sargassum         | 10576               | 8620                     | 1317           | 0.50                      |
| 14            | DD8       | Sargassum         | 10373               | 8085                     | 1169           | 2.43                      |
| 15            | DD9       | Sargassum         | 5008                | 4145                     | 801            | 0.60                      |
| 16            | DD10      | Sargassum         | 6446                | 5573                     | 1000           | 0.68                      |
| 17            | DD11      | Sargassum         | 8521                | 6571                     | 940            | 0.05                      |
| 18            | DD12      | Sargassum         | 9669                | 7963                     | 1076           | 0.42                      |
| 19            | DD13      | Sargassum         | 6446                | 6688                     | 1208           | 0.36                      |
| 20            | DD14      | Sargassum         | 3054                | 2548                     | 538            | 0.28                      |
| 21            | DD15      | Sargassum         | 6445                | 5943                     | 978            | 1.05                      |
| 22            | DD16      | Sargassum         | 9983                | 7798                     | 1302           | 0.66                      |
| 23            | DD17      | Sargassum         | 16963               | 14225                    | 1321           | 0.48                      |
| 24            | DD18      | Sargassum         | 13505               | 10587                    | 1528           | 0.57                      |
| 25            | DD19      | Sargassum         | 3294                | 2878                     | 712            | 5.29                      |
| 26            | DD20      | Sargassum         | 1731                | 1546                     | 266            | 3.48                      |

|    |      |                   |       |       |      |      |
|----|------|-------------------|-------|-------|------|------|
| 27 | DD21 | Sargassum         | 3399  | 3012  | 739  | 6.20 |
| 28 | C1   | Sewage Sludge     | 9085  | 6842  | 882  | 16.8 |
| 29 | C2   | Sewage Sludge     | 2166  | 1530  | 307  | 14.9 |
| 30 | C3   | Sewage Sludge     | 5956  | 4724  | 733  | 4.51 |
| 31 | C4   | Sewage Sludge     | 2127  | 1601  | 294  | 1.89 |
| 32 | C5   | Sewage Sludge     | 3288  | 2486  | 512  | 8.36 |
| 33 | C6   | Sewage Sludge     | 8838  | 4844  | 874  | 0.70 |
| 34 | C7   | Codigested Sludge | 5523  | 2426  | 386  | 0.04 |
| 35 | C8   | Codigested Sludge | 2776  | 1725  | 376  | 0.41 |
| 36 | C9   | Codigested Sludge | 2588  | 1718  | 372  | 0.30 |
| 37 | C10  | Codigested Sludge | 6446  | 1495  | 366  | 0    |
| 38 | C11  | Codigested Sludge | 7316  | 4951  | 671  | 0.10 |
| 39 | BR.1 | Sewage Sludge     | 12077 | 11734 | 1318 | 3.98 |
| 40 | BR.2 | Sewage Sludge     | 14761 | 8066  | 1643 | 0.30 |
| 41 | BR.3 | Sewage Sludge     | 5111  | 4890  | 861  | 0.53 |
| 42 | BR.4 | Sewage Sludge     | 8189  | 7868  | 2199 | 0.02 |
| 43 | BR.5 | Sewage Sludge     | 11901 | 11415 | 2750 | 0    |
| 44 | BR.6 | Sewage Sludge     | 10563 | 10238 | 1520 | 0.26 |

**Supplementary Table 5** Physical parameters of the bioreactors associated with metagenomics samples

'PD' signifies pre-digester, 'DG' signifies main digester, 'NA' denotes not available.

Low salinity bioreactor

| Sampling Day | pH   |      | Alkalinity (g/L) CaCO <sub>3</sub> eq. |      | Total Solids (g/L) |       | Volatile Solids(g/L) |       |
|--------------|------|------|----------------------------------------|------|--------------------|-------|----------------------|-------|
|              | PD   | DG   | PD                                     | DG   | PD                 | DG    | PD                   | DG    |
| Day 1        | 7.30 | 7.30 | 0.72                                   | 0.72 | NA                 | NA    | NA                   | NA    |
| Day 36       | 6.52 | 6.76 | 3.15                                   | 2.25 | 30.60              | 43.20 | 16.80                | 14.50 |
| Day 99       | 7.22 | 7.30 | 3.62                                   | 4.34 | 66.50              | 74.00 | 20.20                | 14.40 |
| Day 180      | 6.88 | 7.11 | 4.32                                   | 3.46 | 48.90              | 73.40 | 12.90                | 10.40 |

High salinity bioreactor

| Sampling Day | PH   |      | Alkalinity (g/L) CaCO <sub>3</sub> eq. |      | Total Solids (g/L) |       | Volatile Solids (g/L) |       |
|--------------|------|------|----------------------------------------|------|--------------------|-------|-----------------------|-------|
|              | PD   | DG   | PD                                     | DG   | PD                 | DG    | PD                    | DG    |
| Day 1        | 7.33 | 7.33 | 0.72                                   | 0.72 | NA                 | NA    | NA                    | NA    |
| Day 36       | 6.92 | 6.97 | 3.15                                   | 3.60 | 29.60              | 46.40 | 27.70                 | 14.50 |
| Day 99       | 7.20 | 6.98 | 8.68                                   | 3.62 | 33.20              | 56.90 | 14.40                 | 14.40 |
| Day 180      | 6.97 | 6.91 | 6.57                                   | 4.48 | 26.90              | 55.80 | 26.50                 | 10.40 |



## Supplementary Table 6 Sequence statistics of shotgun metagenomic datasets

The table contains the information about the ten shotgun metagenomics data that were used for comparative meta-metabolic network and community profile analysis. The substrate type, number of raw reads, sequence length in base pairs (bp) and the number of 16S rRNA retrieved are given for each sample ID.

|           |                                             |                     |                                        |          |                                                | Acetogenesis                                                       | Acidogenesis                                     |                                                  |                                                                       | Hydrogen Production                                  |                                                      |                                        |                                       |                           |
|-----------|---------------------------------------------|---------------------|----------------------------------------|----------|------------------------------------------------|--------------------------------------------------------------------|--------------------------------------------------|--------------------------------------------------|-----------------------------------------------------------------------|------------------------------------------------------|------------------------------------------------------|----------------------------------------|---------------------------------------|---------------------------|
| Sample ID | Substrate                                   | Number of raw reads | Sequence lengths (bp) (mean $\pm$ std) | 16S rRNA | Proportion of archaeal 16S rDNA fragments ( %) | formyltetrahydrofolate synthetase genes(per 100000 predicted ORFs) | acetate kinase genes (per 100000 predicted ORFs) | butyrate kinase genes(per 100000 predicted ORFs) | butyryl-CoA:acetate-CoA transferase genes (per 100000 predicted ORFs) | [FeFe]-hydrogenase genes (per 100000 predicted ORFs) | [NiFe]-hydrogenase genes (per 100000 predicted ORFs) | mcrA genes (per 100000 predicted ORFs) | pfk genes (per 100000 predicted ORFs) | References                |
| B1        | Sargassum (high salt, 15 L bioreactor)      | 1635017             | 236 $\pm$ 43                           | 1562     | 0.3                                            | 1.94                                                               | 1.63                                             | 1.19                                             | 0.88                                                                  | 3.01                                                 | 0.13                                                 | 0.13                                   | 7.15                                  | This work                 |
| B2        | Sargassum (high salt, first stage, day 99)  | 2607391             | 284 $\pm$ 44                           | 3214     | 9.02                                           | 4.92                                                               | 3.54                                             | 1.94                                             | 6.49                                                                  | 10.41                                                | 0.63                                                 | 4.59                                   | 6.72                                  | This work                 |
| B3        | Sargassum (high salt, second stage, day 99) | 1544020             | 277 $\pm$ 56                           | 1524     | 7.71                                           | 6.55                                                               | 10.01                                            | 3.65                                             | 7.11                                                                  | 12.24                                                | 1.54                                                 | 4.39                                   | 7.97                                  | This work                 |
| B4        | Panicum virgatum(Spirulina)                 | 548733              | 524 $\pm$ 66                           | 772      | 0                                              | 11.50                                                              | 5.53                                             | 0.15                                             | 7.72                                                                  | 0.58                                                 | 0.87                                                 | 0.00                                   | 2.91                                  | Allgaier et al. 2010      |
| B5        | Spirulina                                   | 1019333             | 159 $\pm$ 44                           | 1862     | 30.33                                          | 26.48                                                              | 7.33                                             | 3.98                                             | 2.20                                                                  | 7.53                                                 | 0.00                                                 | 1.18                                   | 3.43                                  | Nolla-Ardèvol et al. 2015 |
| B6        | Codigested sludge                           | 194460              | 201 $\pm$ 76                           | 396      | 0                                              | 38.36                                                              | 28.21                                            | 6.21                                             | 2.82                                                                  | 31.03                                                | 1.13                                                 | 4.51                                   | 7.33                                  | Wirth et al. 2015         |
| B7        | Sc obliquus                                 | 155532              | 195 $\pm$ 66                           | 356      | 1.83                                           | 33.57                                                              | 25.00                                            | 7.86                                             | 3.57                                                                  | 32.14                                                | 0.00                                                 | 0.00                                   | 51.90                                 | Wirth et al. 2015         |
| B8        | Codigested sludge                           | 761308              | 213 $\pm$ 63                           | 1131     | 2.25                                           | 38.71                                                              | 11.31                                            | 8.31                                             | 6.13                                                                  | 15.26                                                | 0.55                                                 | 0.00                                   | 19.11                                 | Wirth et al. 2015         |
| B9        | Codigested sludge                           | 781297              | 420 $\pm$ 40                           | 1162     | 2.01                                           | 49.64                                                              | 22.93                                            | 13.63                                            | 12.01                                                                 | 24.77                                                | 0.97                                                 | 0.87                                   | 16.10                                 | Li et al. 2013            |
| B10       | Codigested sludge                           | 551339              | 358 $\pm$ 111                          | 835      | 0.18                                           | 65.87                                                              | 11.86                                            | 13.34                                            | 14.49                                                                 | 24.87                                                | 1.15                                                 | 1.61                                   | 26.70                                 | Li et al. 2013            |

Additional references:

Allgaier, M. et al. (2010) Targeted discovery of glycoside hydrolases from a switchgrass-adapted compost community. *PLoS ONE* **5**, e8812.

Nolla-Ardèvol et al. (2015) Metagenome from a Spirulina digesting biogas reactor: analysis via binning of contigs and classification of short reads. *BMC Microbiology* **15**, 277.

Wirth, R. et al. (2015) Metagenome changes in the mesophilic biogas-producing community during fermentation of the green alga *Scenedesmus obliquus*. *Journal of Biotechnology* **215**, 52-61.
